# Supplementary material for: A Comparative Study on Inhibition of Breast Cancer Cells and Tumors in Mice by Carotenoid Extract and Nanoemulsion Prepared from Sweet Potato (Ipomoea batatas L.) Peel
Source: MDPI journal article supplement (doi:10.3390/pharmaceutics14050980), 2022-05-02
Supplement: s1 [file s1]

Supplementary Materials

for

**A Comparative Study on Inhibition of Breast Cancer Cells and Tumors in Mice  
by Carotenoid Extract and Nanoemulsion Prepared from Sweet Potato  
(*Ipomoea batatas* L.) Peel**

**Hsin-Yen Hsu<sup>1</sup> and Bing-Huei Chen<sup>1,2,\*</sup>**

<sup>1</sup>Department of Food Science, Fu Jen Catholic University, New Taipei City 242, Taiwan;  
luckypinocat@gmail.com (H.-Y.H).

<sup>2</sup>Department of Nutrition, China Medical University, Taichung 40402, Taiwan.

\* Corresponding author (002622@mail.fju.edu.tw (B.-H.C)).

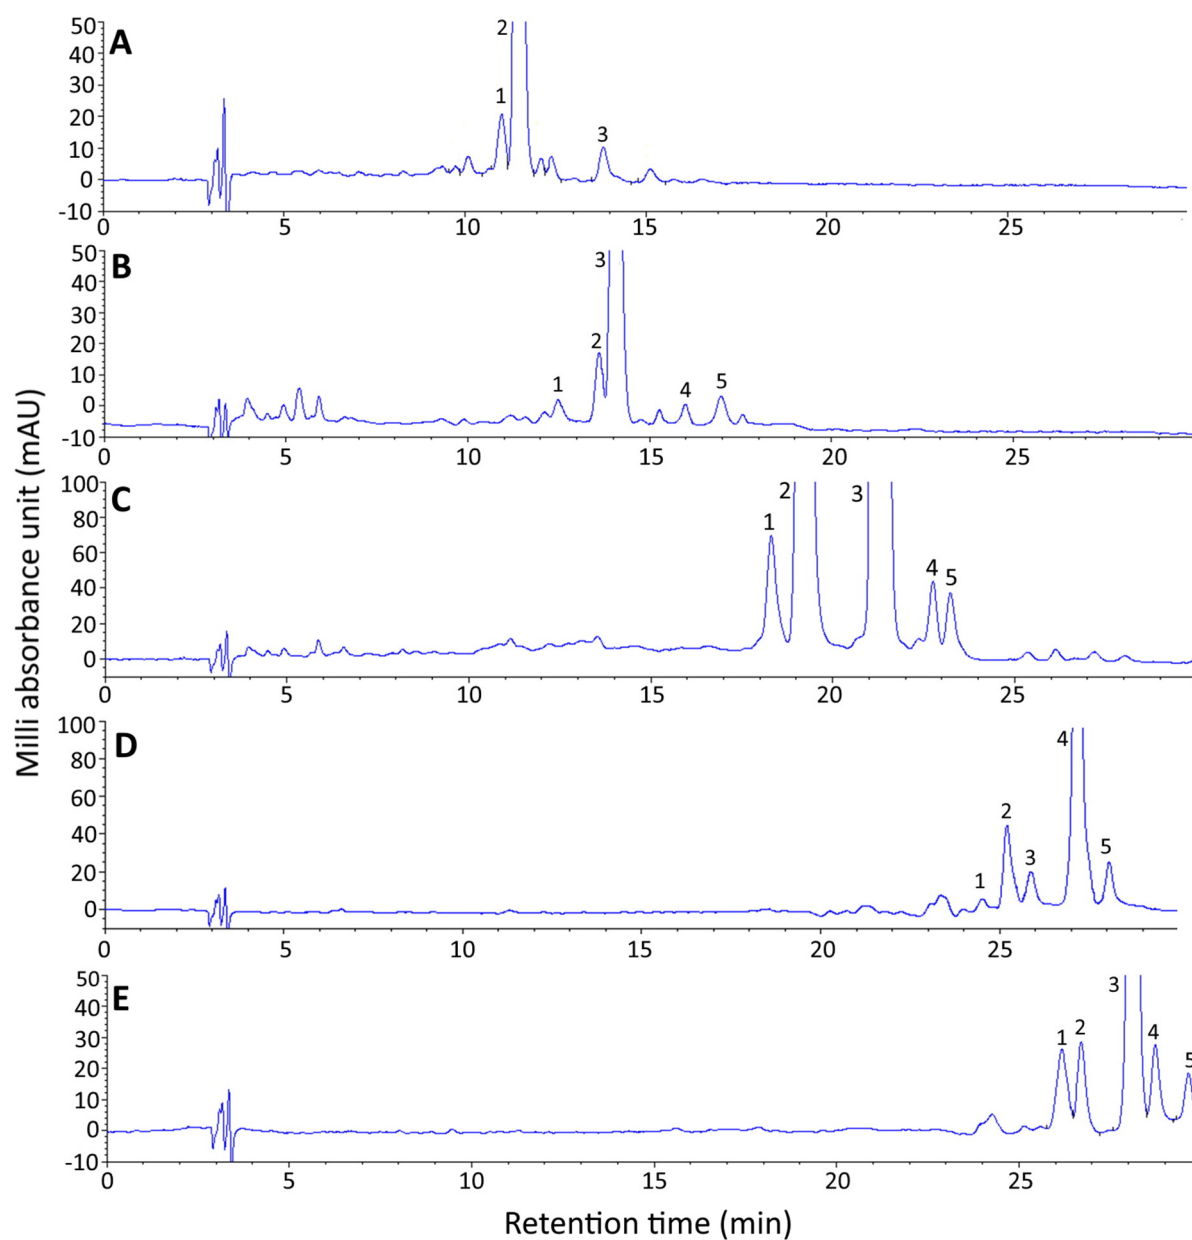

**Figure S1** – HPLC chromatogram of all-*trans*-lutein, all-*trans*-zeaxanthin, all-*trans*- $\beta$ -cryptoxanthin, all-*trans*- $\beta$ -carotene and all-*trans*- $\alpha$ -carotene standards along with their *cis* isomers during illumination at 25°C for 24 h. A: 1, *cis*-lutein; 2, all-*trans*-lutein; 3, 9- or 9'-*cis*-lutein. B: 1, 13- or 13'-*cis*-zeaxanthin; 2, 15- or 15'-*cis*-zeaxanthin; 3, All-*trans*-zeaxanthin; 4, 9- or 9'-*cis*-zeaxanthin; 5, 9- or 9'-*cis*-zeaxanthin. C: 1, 13- or 13'-*cis*- $\beta$ -cryptoxanthin; 2, 15- or 15'-*cis*- $\beta$ -cryptoxanthin; 3, all-*trans*- $\beta$ -cryptoxanthin; 4, 9- or 9'-*cis*- $\beta$ -cryptoxanthin; 5, 9- or 9'-*cis*- $\beta$ -cryptoxanthin; D: 1, 15- or 15'-*cis*- $\beta$ -carotene; 2, 13- or 13'-*cis*- $\beta$ -carotene; 3, 9- or 9'-*cis*- $\beta$ -carotene; 4, All-*trans*- $\beta$ -carotene; 5, 9- or 9'-*cis*- $\beta$ -carotene. E: 1, 13- or 13'-*cis*- $\alpha$ -carotene; 2, 13- or 13'-*cis*- $\alpha$ -carotene; 3, All-*trans*- $\alpha$ -carotene; 4, 9- or 9'-*cis*- $\alpha$ -carotene; 5, 9- or 9'-*cis*- $\alpha$ -carotene. The identification data for all the all-*trans* plus *cis* isomers of carotenoids are provided in the Table S2.

**Table S1.** Identification data for all-*trans* plus *cis* forms of carotenoids in sweet potato peel extract by HPLC-DAD-MS.

| Peak no. | Compound                                        | $\lambda$ (nm, inline) | $\lambda$ (nm, reported)        | Q-ratio found | Q-ratio reported  | m/z found                             | m/z reported                                       |
|----------|-------------------------------------------------|------------------------|---------------------------------|---------------|-------------------|---------------------------------------|----------------------------------------------------|
| 1        | All- <i>trans</i> -violaxanthin                 | 414, 438, 466          | 416,439,469 <sup>d</sup>        | —             | —                 | 601[M+H], 583[M+H-18]                 | 601[M+H], 583[M+H-18] <sup>a</sup>                 |
| 2        | <i>cis</i> -lutein                              | 408, 430, 456          | 336, 412, 432, 456 <sup>a</sup> | 0.08          | 0.12 <sup>a</sup> | 569[M+H], 551[M+H-18]                 | 569[M+H], 551[M+H-18] <sup>b</sup>                 |
| 3        | All- <i>trans</i> -lutein                       | 424, 445, 472          | 422, 446, 474 <sup>a</sup>      | —             | 0.06 <sup>a</sup> | 569[M+H], 551[M+H-18], 533[M+H-18-18] | 569[M+H], 551[M+H-18], 533[M+H-18-18] <sup>a</sup> |
| 4        | All- <i>trans</i> -zeaxanthin                   | 430, 454, 476          | 452, 478 <sup>a</sup>           | —             | —                 | 569[M+H], 551[M+H-18]                 | 569[M+H], 551[M+H-18] <sup>b</sup>                 |
| IS       | All- <i>trans</i> -canthaxanthin                | 478                    | —                               | —             | —                 | —                                     | —                                                  |
| 5        | 15- or 15'- <i>cis</i> - $\beta$ -cryptoxanthin | 338, 423, 448, 474     | 340,424,446,474 <sup>a</sup>    | 0.47          | 0.43 <sup>a</sup> | 553[M+H]                              | 553[M+H] <sup>c</sup>                              |
| 6        | All- <i>trans</i> - $\beta$ -cryptoxanthin      | 426, 452, 478          | 428, 450, 477 <sup>b</sup>      | —             | 0.04 <sup>b</sup> | 553[M+H], 533[M+H-18]                 | 553[M+H], 535[M+H-18] <sup>b</sup>                 |
| 7        | 15- or 15'- <i>cis</i> - $\beta$ -carotene      | 342, 428, 452, 478     | 342 448 474 <sup>a</sup>        | 0.43          | 0.50 <sup>a</sup> | 537[M+H]                              | 537[M+H] <sup>b</sup>                              |
| 8        | 13- or 13'- <i>cis</i> - $\beta$ -carotene      | 342, 422, 450, 478     | 345,451,479 <sup>b</sup>        | 0.32          | 0.36 <sup>b</sup> | 537[M+H]                              | 537[M+H] <sup>a</sup>                              |
| 9        | All- <i>trans</i> - $\beta$ -carotene           | 456, 482               | 454, 482 <sup>b</sup>           | —             | —                 | 537[M+H]                              | 537[M+H] <sup>a</sup>                              |
| 10       | All- <i>trans</i> - $\alpha$ -carotene          | 428, 452, 476          | 424, 450, 476 <sup>c</sup>      | —             | 0.05 <sup>c</sup> | 537[M+H]                              | 537[M+H] <sup>b</sup>                              |

Based on a report by <sup>a</sup> Kao et al. [11], <sup>b</sup> Strati et al. [17], <sup>c</sup> Kao et al. [18] and <sup>d</sup> Schex et al. [19]. The reference numbers are same as provided in the main text.

**Table S2.** Identification data for all-*trans* plus *cis* forms of lutein, zeaxanthin,  $\beta$ -cryptoxanthin,  $\beta$ -carotene and  $\alpha$ -carotene.

| Peak no. | Compound                                        | t <sub>R</sub> (min) | k    | $\lambda$ (nm, inline) | $\lambda$ (nm, reported)     | Q-ratio found | Q-ratio reported  |
|----------|-------------------------------------------------|----------------------|------|------------------------|------------------------------|---------------|-------------------|
| 1        | <i>Cis</i> -lutein                              | 11.01                | 2.44 | 336,420,442,470        | 332,410,434,458 <sup>a</sup> | 0.42          | 0.31 <sup>c</sup> |
| 2        | All- <i>trans</i> -lutein                       | 11.48                | 2.58 | 336,424,448,476        | 423, 447, 477 <sup>b</sup>   | —             | 0.04 <sup>b</sup> |
| 3        | 9- or 9'- <i>cis</i> -lutein                    | 13.91                | 3.34 | 336,422,444,472        | 332 423 446 470 <sup>c</sup> | 0.10          | 0.08 <sup>a</sup> |
| 1        | 13- or 13'- <i>cis</i> - zeaxanthin             | 12.49                | 2.90 | 338 424 448 472        | 338 424 446 472 <sup>d</sup> | 0.23          | 0.37 <sup>b</sup> |
| 2        | 15- or 15'- <i>cis</i> - zeaxanthin             | 13.68                | 3.27 | 340 426 448 472        | 338 422 446 470 <sup>d</sup> | 0.42          | 0.45 <sup>b</sup> |
| 3        | All- <i>trans</i> - zeaxanthin                  | 14.16                | 3.42 | 456 480                | 452 478 <sup>a</sup>         | —             | 0.03 <sup>a</sup> |
| 4        | 9- or 9'- <i>cis</i> - zeaxanthin               | 16.02                | 4.00 | 340 426 448 478        | 338 422 446 474 <sup>d</sup> | 0.09          | 0.12 <sup>b</sup> |
| 5        | 9- or 9'- <i>cis</i> - zeaxanthin               | 16.98                | 4.30 | 340 426 448 478        | 338 422 446 474 <sup>d</sup> | 0.09          | 0.12 <sup>b</sup> |
| 1        | 13- or 13'- <i>cis</i> - $\beta$ -cryptoxanthin | 18.43                | 4.75 | 342 452 472            | 340 422 446 474 <sup>d</sup> | 0.50          | 0.45 <sup>c</sup> |
| 2        | 15- or 15'- <i>cis</i> - $\beta$ -cryptoxanthin | 19.40                | 5.06 | 342 448 472            | 340 424 446 474 <sup>d</sup> | 0.30          | 0.43 <sup>c</sup> |
| 3        | All- <i>trans</i> - $\beta$ -cryptoxanthin      | 21.38                | 5.68 | 454 482                | 450 477 <sup>b</sup>         | —             | —                 |
| 4        | 9- or 9'- <i>cis</i> - $\beta$ -cryptoxanthin   | 22.85                | 6.14 | 342 450 474            | 336 420 446 473 <sup>e</sup> | 0.05          | 0.10 <sup>a</sup> |
| 5        | 9- or 9'- <i>cis</i> - $\beta$ -cryptoxanthin   | 23.42                | 6.31 | 342 452 476            | 336 420 446 473 <sup>e</sup> | 0.05          | 0.10 <sup>a</sup> |
| 1        | 15- or 15'- <i>cis</i> - $\beta$ -carotene      | 24.51                | 6.65 | 342 458 480            | 342 448 474 <sup>d</sup>     | 0.58          | 0.50 <sup>a</sup> |
| 2        | 13- or 13'- <i>cis</i> - $\beta$ -carotene      | 25.24                | 6.88 | 344 424 448 474        | 344 423 446 476 <sup>a</sup> | 0.45          | 0.43 <sup>b</sup> |
| 3        | 9- or 9'- <i>cis</i> - $\beta$ -carotene        | 25.88                | 7.08 | 344 424 450 476        | 344, 452, 476 <sup>d</sup>   | 0.14          | 0.14 <sup>a</sup> |
| 4        | All- <i>trans</i> - $\beta$ -carotene           | 27.16                | 7.48 | 458 484                | 454 482 <sup>b</sup>         | —             | —                 |
| 5        | 9- or 9'- <i>cis</i> - $\beta$ -carotene        | 28.18                | 7.70 | 344 426 454 478        | 344, 452, 476 <sup>d</sup>   | 0.09          | 0.14 <sup>a</sup> |
| 1        | 13- or 13'- <i>cis</i> - $\alpha$ -carotene     | 26.21                | 7.19 | 334 420 444 470        | 334 418 442 470 <sup>f</sup> | 0.48          | 0.50 <sup>b</sup> |
| 2        | 13- or 13'- <i>cis</i> - $\alpha$ -carotene     | 26.73                | 7.35 | 336 420 444 470        | 334 418 442 470 <sup>f</sup> | 0.40          | 0.50 <sup>b</sup> |
| 3        | All- <i>trans</i> - $\alpha$ -carotene          | 28.17                | 7.80 | 424 452 480            | 424 450 476 <sup>f</sup>     | 0.06          | 0.05 <sup>b</sup> |
| 4        | 9- or 9'- <i>cis</i> - $\alpha$ -carotene       | 28.73                | 7.97 | 340 422 448 474        | 330 419 441 469 <sup>e</sup> | 0.09          | 0.08 <sup>a</sup> |
| 5        | 9- or 9'- <i>cis</i> - $\alpha$ -carotene       | 29.60                | 8.25 | 340 424 448 474        | 330 419 441 469 <sup>e</sup> | 0.09          | 0.08 <sup>a</sup> |

Based on a report by <sup>a</sup>Inbaraj et al. [12], <sup>b</sup>Straiti et al. [17], <sup>c</sup>Liu et al. [20], <sup>d</sup>Kao et al. [11], <sup>e</sup>Gupta et al. [21] and <sup>f</sup>Kao et al. [18]. The reference numbers are same as provided in the main text.

## References

11. Kao, T.H.; Loh, C.H.; Inbaraj, B.S.; Chen, B.H. Determination of carotenoids in *Taraxacum formosanum* by HPLC-DAD-APCI-MS and preparation by column chromatography. *J. Pharm. Biomed. Anal.* **2012**, *66*, 144-153.
12. Inbaraj, B.S.; Chien, J.T.; Chen, B.H. Improved high performance liquid chromatographic method for determination of carotenoids in the microalga *Chlorella pyrenoidosa*. *J. Chromatogr. A* **2006**, *1102*, 193-199.
17. Straiti, I.F.; Sinanoglou, V.J.; Kora, L.; Miniadis-Meimaroglou, S.; Oreopoulou, V. Carotenoids from foods of plant, animal and marine origin: an efficient HPLC-DAD separation method. *Foods* **2012**, *1*, 52-65.
18. Kao, T.H.; Chen, C.J.; Chen, B.H. Carotenoid composition in *Rhinacanthus nasutus* (L.) Kurz as determined by HPLC-MS and affected by freeze-drying and hot-air-drying. *Analyst* **2011**, *136*, 3194-3202.
19. Schex, R.; Lieb, V.M.; Jiménez, V.M.; Esquivel, P.; Schweiggert, R.M.; Carle, R.; Steingass, C.B. HPLC-DAD-APCI/ESI-MSn analysis of carotenoid and  $\alpha$ -tocopherol in Costa Rican *Acrocomia aculeata* fruits of varying maturity stages. *Food Res Int.* **2018**, *105*, 645-653.
20. Liu, H.L.; Chen, B.H.; Kao, T.H.; Shiau, C.Y. Carotenoids composition in *Scutellaria barbata* D. Don as detected by high performance liquid chromatography-diode array detection-mass spectrometry-atmospheric pressure chemical ionization. *J. Funct. Foods* **2014**, *8*, 605-610.
21. Gupta, P.; Sreelakshmi, T.; Sharma, R. A rapid and sensitive method for determination of carotenoids in plant tissues by high performance liquid chromatography. *Plant Methods* **2015**, *11*, 5.
